# Supplementary material for: Unraveling the Effect of Synthesis Temperature and Metal Doping on the Structural, Optical, and Photocatalytic Properties of g-C3N4 for Enhanced E. coli Photodisinfection and Self-Cleaning Surface Applications
Source: MDPI journal article supplement (doi:10.3390/inorganics13080262), 2025-08-11
Supplement: s1 [file inorganics-3707535-supplementary.pdf › inorganics-3707535-supplementary.pdf]

## Supplementary Materials

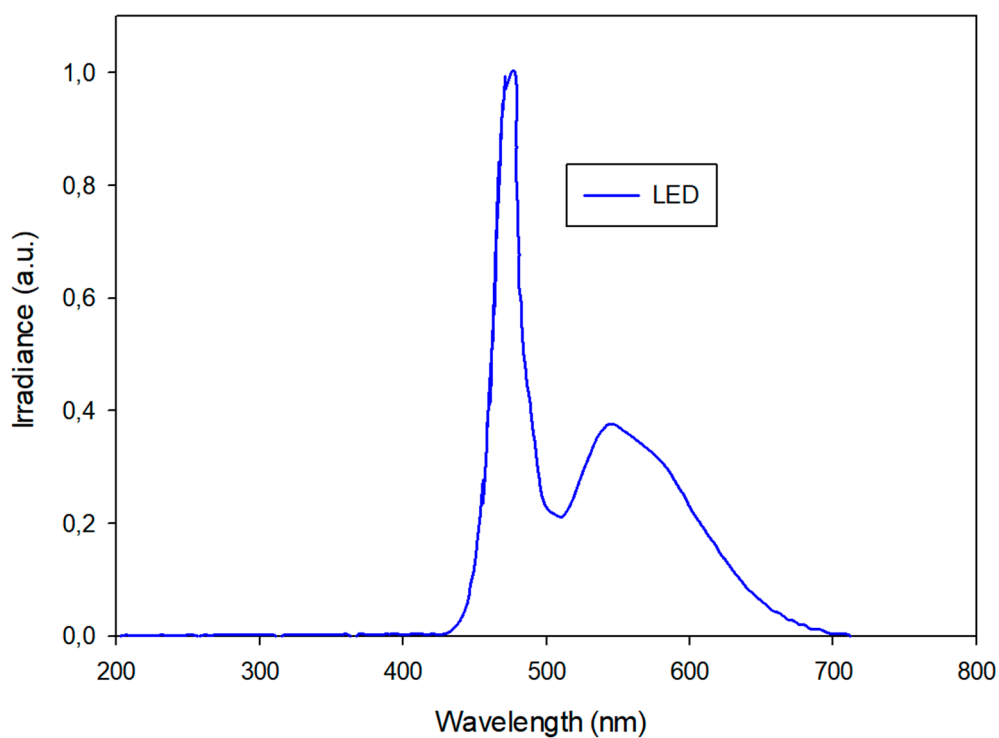

**Figure S1.** Irradiance spectrum of the used LEDs.

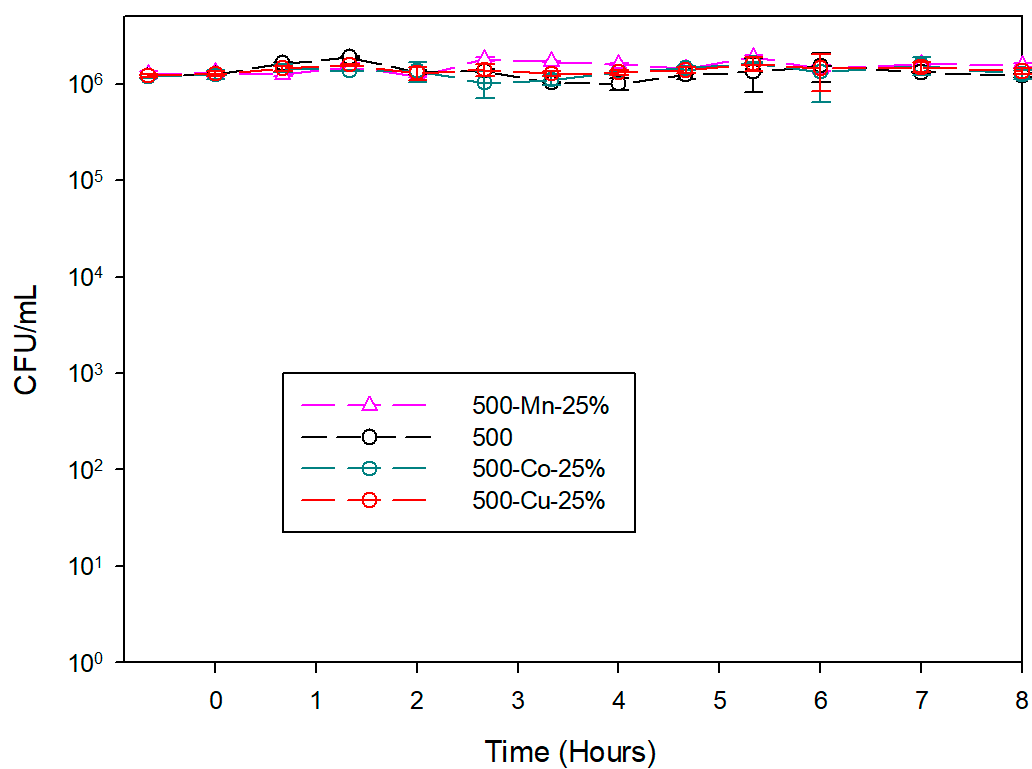

**Figure S2.** *E. Coli* disinfection kinetic profiles promoted by g-C<sub>3</sub>N<sub>4</sub> obtained at 500 °C doped with 25% of the corresponding metal under dark conditions. Conditions: 10 mL of solution and 5 mg of the corresponding material. The error bars represent the standard deviation from duplicate treatments (n=2).

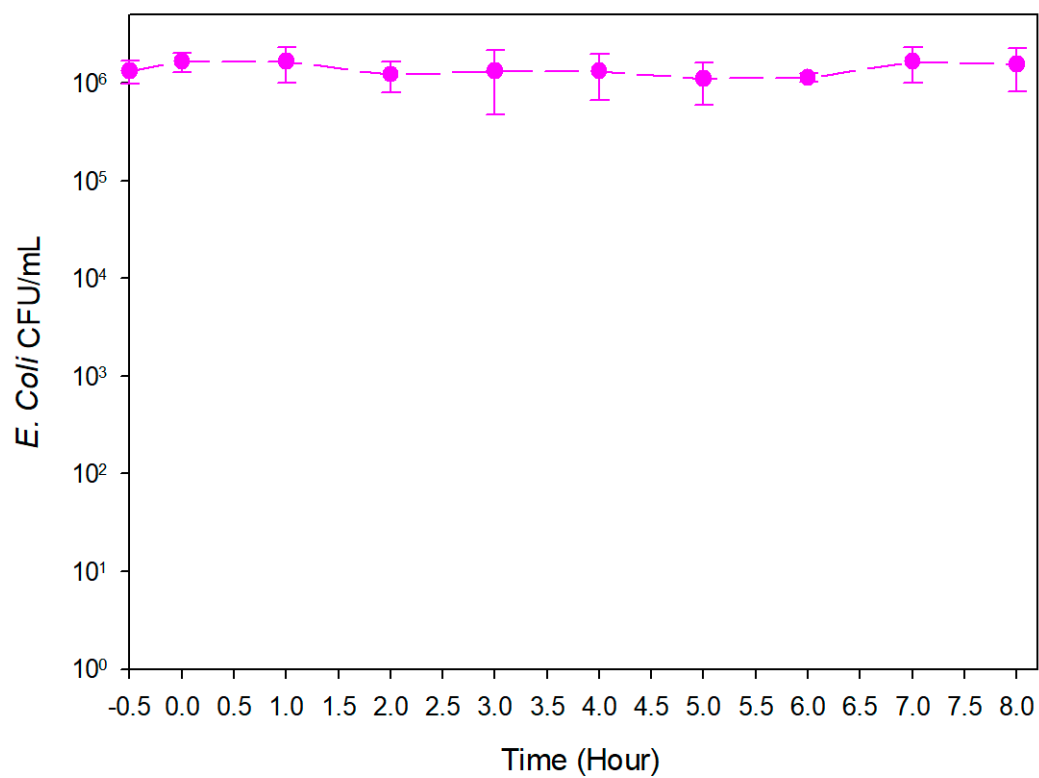

**Figure S3.** *E. coli* disinfection kinetic profiles in presence of soluble  $\text{Mn}^{2+}$  (12.8 mg/L) and under irradiation of indoor light. The error bars represent the standard deviation from duplicate treatments (n=2).
